# Supplementary material
Source: Springer Nature journal article supplement (https://www.springermedizin.de/resource/supplementary/12968_2008_40_MOESM5_ESM.pdf/9577848)

**a**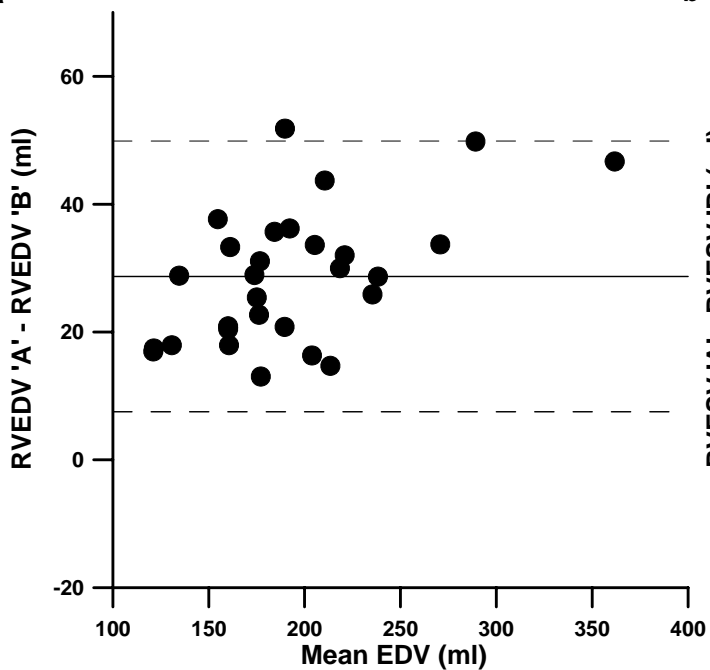**b**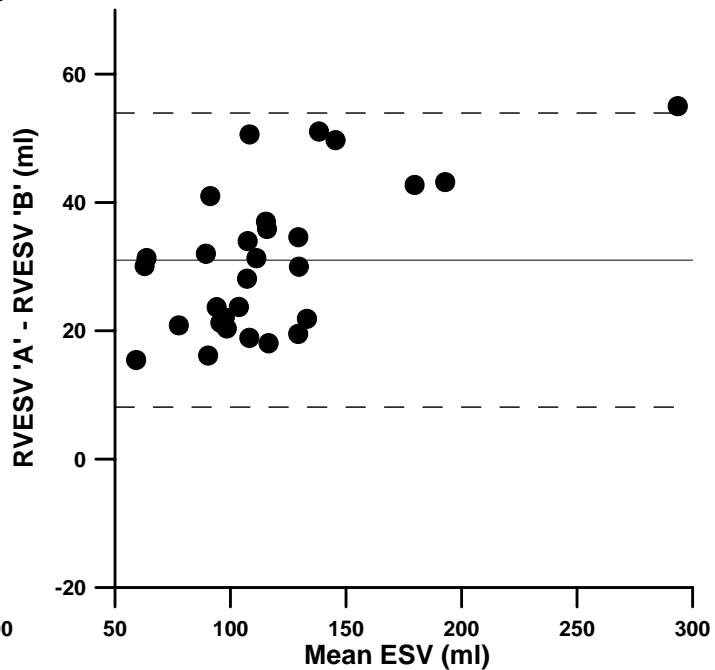**c**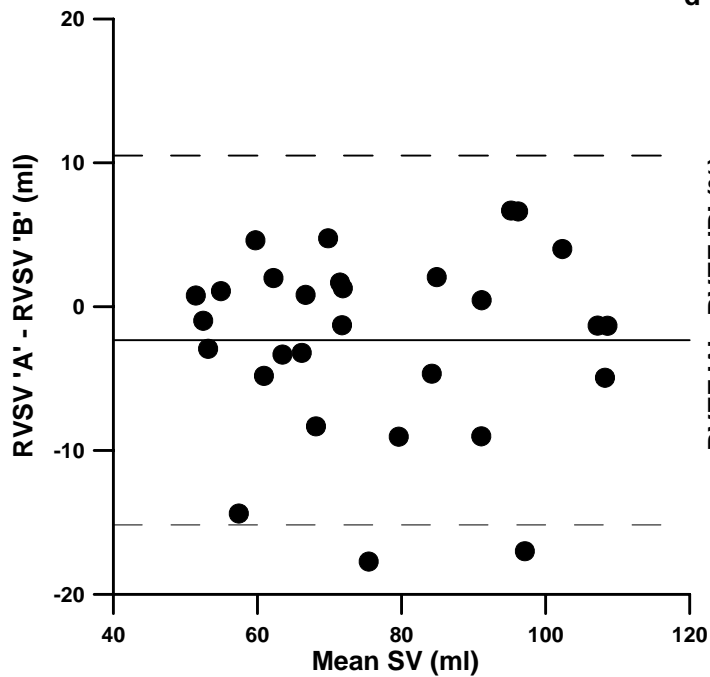**d**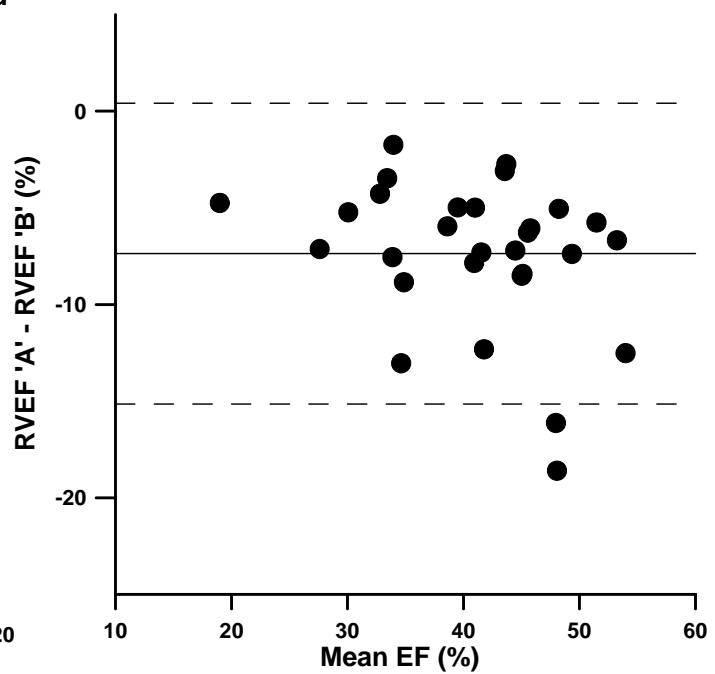

Supplement: MOESM5 [file 9577848]
